# Supplementary material for: Overexpression of microRNA-155 increases IL-21 mediated STAT3 signaling and IL-21 production in systemic lupus erythematosus
Source: PubMed Central journal article supplement (PMC4504038; doi:10.1186/s13075-015-0660-z), 2015-06-09

# miR-155

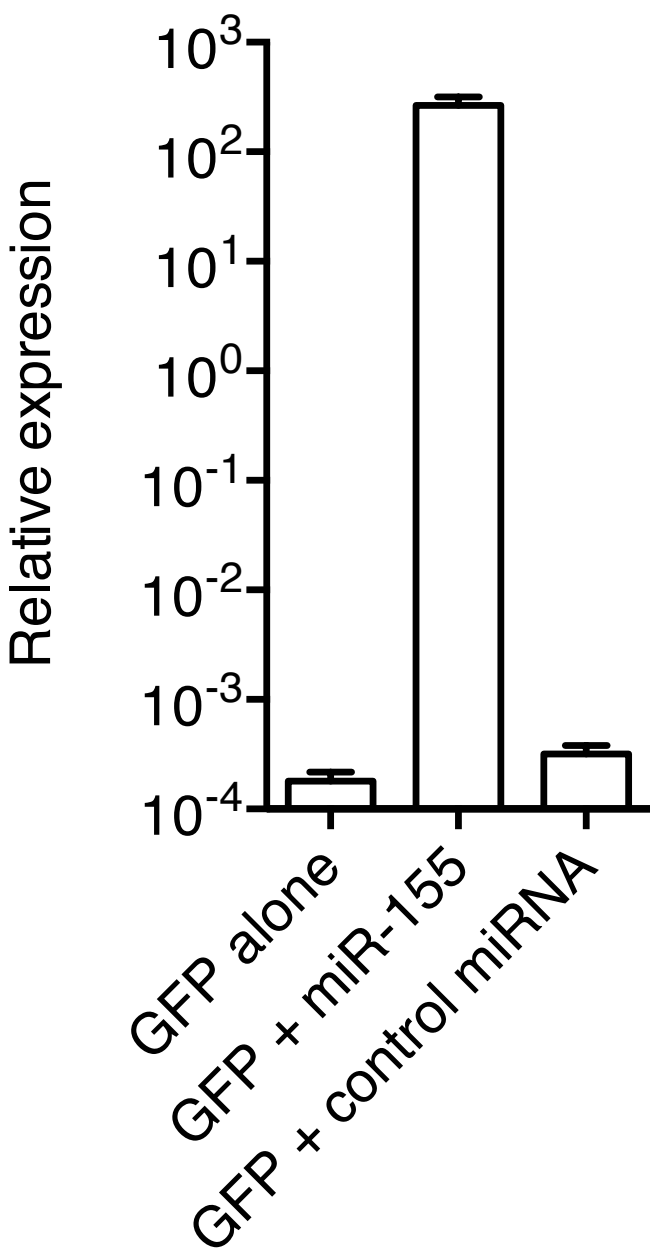

Supplement: 13075_2015_660_MOESM2_ESM.pdf [file 13075_2015_660_MOESM2_ESM.pdf]
